# Supplementary material
Source: HighWire-hosted journal article supplement (https://ijssurgery.com/content/17/4/547)
Supplement: inline-supplementary-material-4 [file inline-supplementary-material-4.docx]

|  |  | **Postoperative** | | |  | Total |
| --- | --- | --- | --- | --- | --- | --- |
|  |  | ABC | D | E |  |  |
| **Preoperative** | ABC | 14 | 20 | 4 |  | **38** |
| D | 2 | 28 | 7 |  | **37** |
| E | 1 | 1 | 26 |  | **28** |
| Total |  | **17** | **49** | **37** |  | 103 |

Supplementary Table 4: Number of patients with the corresponding pre- and postoperative Frankel Scale Scores
