# Supplementary material
Source: HighWire-hosted journal article supplement (https://ijssurgery.com/content/17/4/547)
Supplement: inline-supplementary-material-5 [file inline-supplementary-material-5.docx]

| **Complication** | **Number (% of all patients)** |
| --- | --- |
|  |  |
| **At least one complication** | 55 (38.2) |
|  |  |
| **Number of complications** |  |
| 1 complication | 41 (28.5) |
| 2 or more complications | 14 (1.0) |
|  |  |
| **Major complication** | 22 (15.3) |
| **Minor complication** | 33 (22.9) |
|  |  |
| **Complication type** |  |
|  |  |
| *Surgical Site complication* |  |
|  |  |
| Surgical Site infection (deep) | 15 (10.4) |
| Wound dehiscence | 5 (3.5) |
| Surgical Site Infection (superficial) | 4 (2.8) |
| Epidural Hematoma | 2 (1.4) |
| Implant Failure | 2 (1.4) |
|  |  |
| *Systemic Complication* |  |
|  |  |
| Urinary Tract Infection | 12 (8.3) |
| Pneumonia | 5 (3.5) |
| Pulmonary Embolism | 3 (2.1) |
|  |  |
| *Other* |  |
|  |  |
| Loss of vision (monocular) | 1 (0.7) |
| Worsening neurological deficit | 8 (5.5) |

*Supplementary Table 5: Complications within the 30-days postoperative period*
